# Supplementary material for: Genome Analysis of Three Bacteriophages Targeting Multi Drug Resistant Clinical Isolate of <em>E. coli, </em>Host Receptor Prediction Using Machine Learning Tools and the Evaluation of Monophages and Cocktail In Vitro and In Vivo
Source: Preprints.org preprint supplement (doi:10.20944/preprints202301.0036.v3), 2023-07-10
Supplement: Supplementary file 2 [file supplementary]

**Supplementary Information:**

**Genome analysis of three bacteriophages targeting Multi Drug Resistant clinical isolate of *E. coli,* host receptor prediction using machine learning tools and the evaluation of monophages and cocktail *in vitro* and *in vivo***

Niranjana Sri Sundaramoorthya,b, Vineetha KUa, Veena Nair, Kavi Bharathi, Jean Sophy Roya, Malarvizhi R, Sneha Srinathc, Santhosh Kumar Sc, Prakash Sankaran, Suma Mohan S*c and Saisubramanian Nagarajana,d*

a Center for Research on Infectious Diseases (CRID), School of Chemical and Biotechnology, SASTRA Deemed University, Tamil Nadu, India

b Translational Health Sciences Technology Institute, Faridabad

c Department of Bioinformatics, School of Chemical and Biotechnology, SASTRA Deemed University, Tamil Nadu, India

d  Antimicrobial Resistance Lab, ASK-I-312, School of Chemical and Biotechnology, SASTRA Deemed University, Tamil Nadu, India

*Jointly Communicated

Communicating Authors

Dr. Saisubramanian Nagarajan

Mail id: [sai@scbt.sastra.edu](mailto:sai@scbt.sastra.edu)

Dr. Suma Mohan S

Mail id: [sumamohan@scbt.sastra.edu](mailto:sumamohan@scbt.sastra.edu)

**Supplementary Figure 1:** Spot assay showing the presence of bacteriophages specific to U1007. 1- Water sample from Madurai Pond 1, 2- Cow’s urine sample from Madurai, 3- Water sample from Madurai pond 2, 4 – Urine sample from cow shed at Perambalur, 5 – Dung sample from cow shed at Perambalur, 6 – Water sample from Cauvery river, 7 – Urine sample from SASTRA cow shed, 8 – Dung sample from SASTRA cow shed, 9 – Soil sample from a corn farm, 10 – Soil sample from a onion farm, 11 – Water sample from Ganges river 12- Hospital sewage sample, 13- cuvam river, 14- sewage sample from Taramani area, 15- Railway station area.


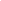

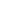


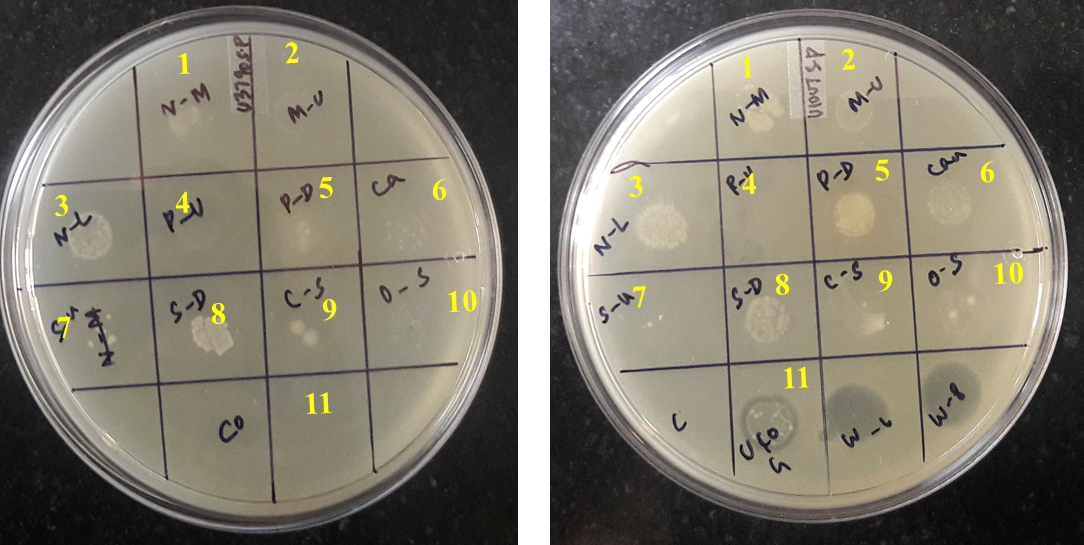


B) U1007


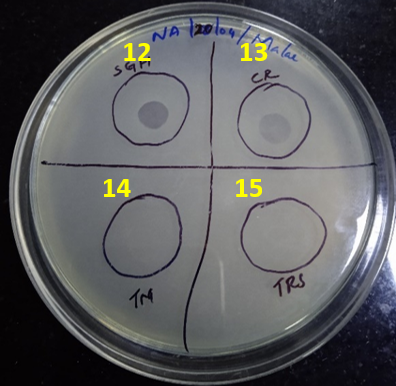


**Supplementary Figure 2**: Genome alignment of the close homologs of Escherichia phage (A)U1G, (B) CR and M with Mauve.


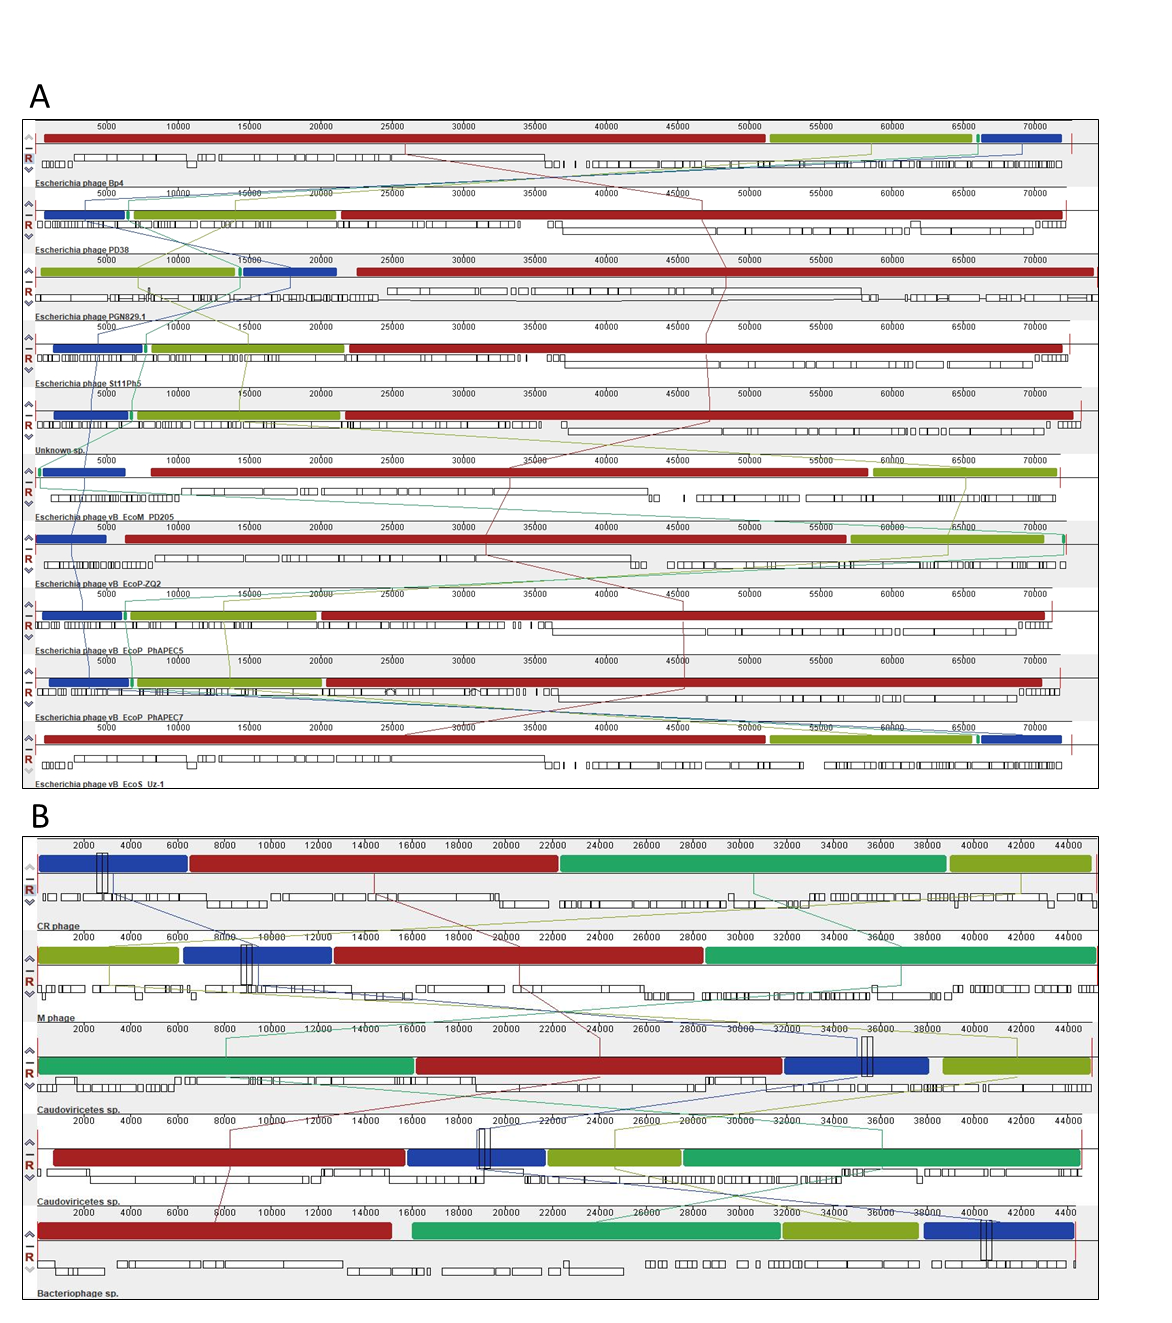


**Supplementary Figure 3: Phylogenetic tree of the potential RBP proteins identified from (A) U1G, (B) CR and (C) M phage.** Phylogenetic tree of the RBP protein constructed with the Maximum Likelihood method with 500 bootstrap values using MEGA11. The homologs of the RBP proteins of U1G, CR and M phages from other bacteriophages were obtained using BLASTp search.
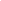


A


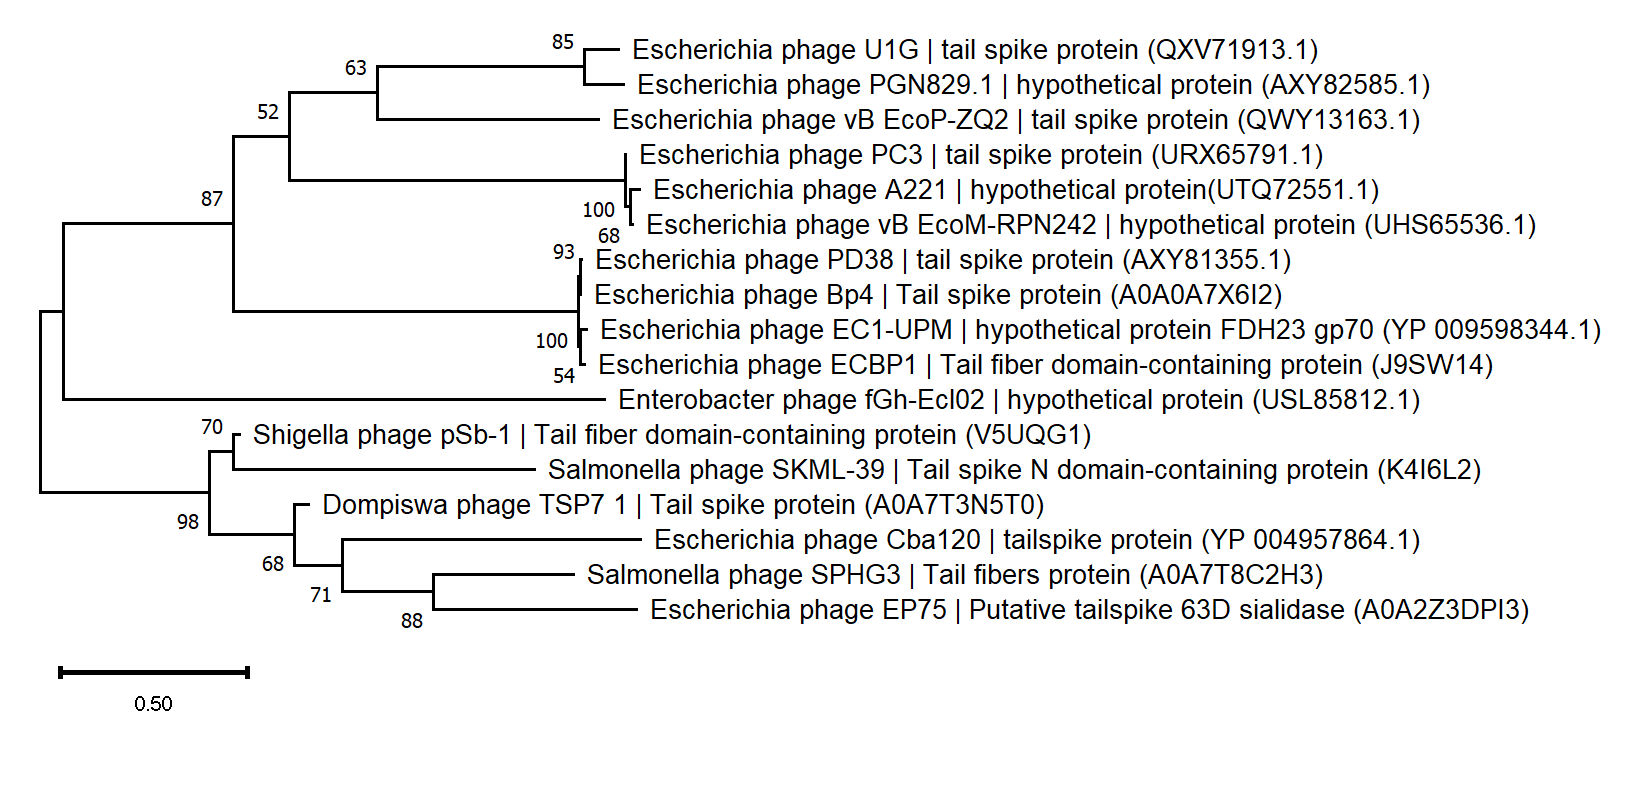


B


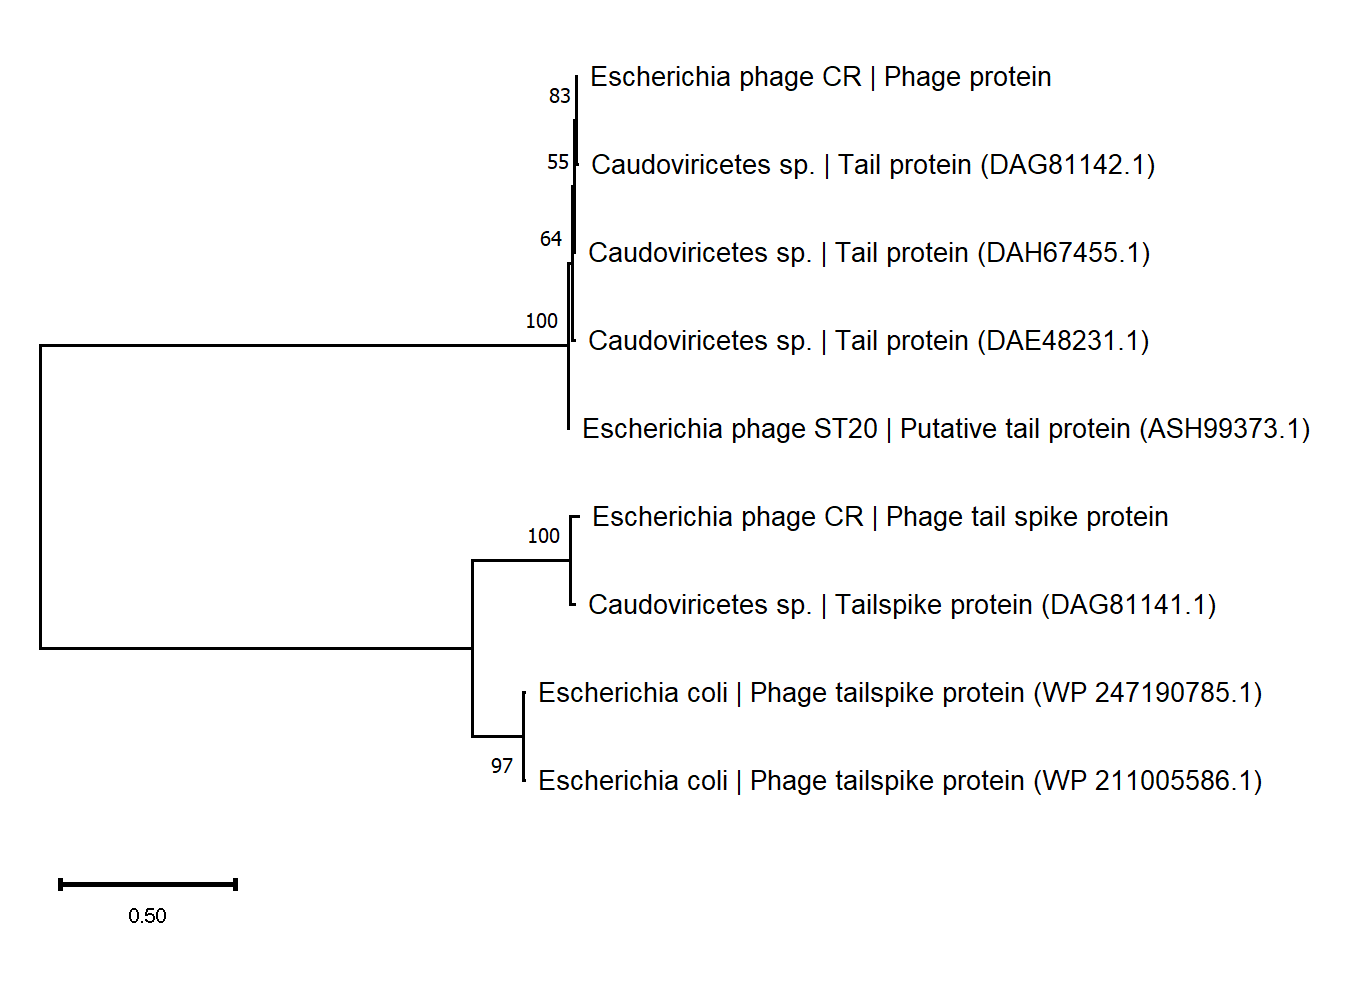


C


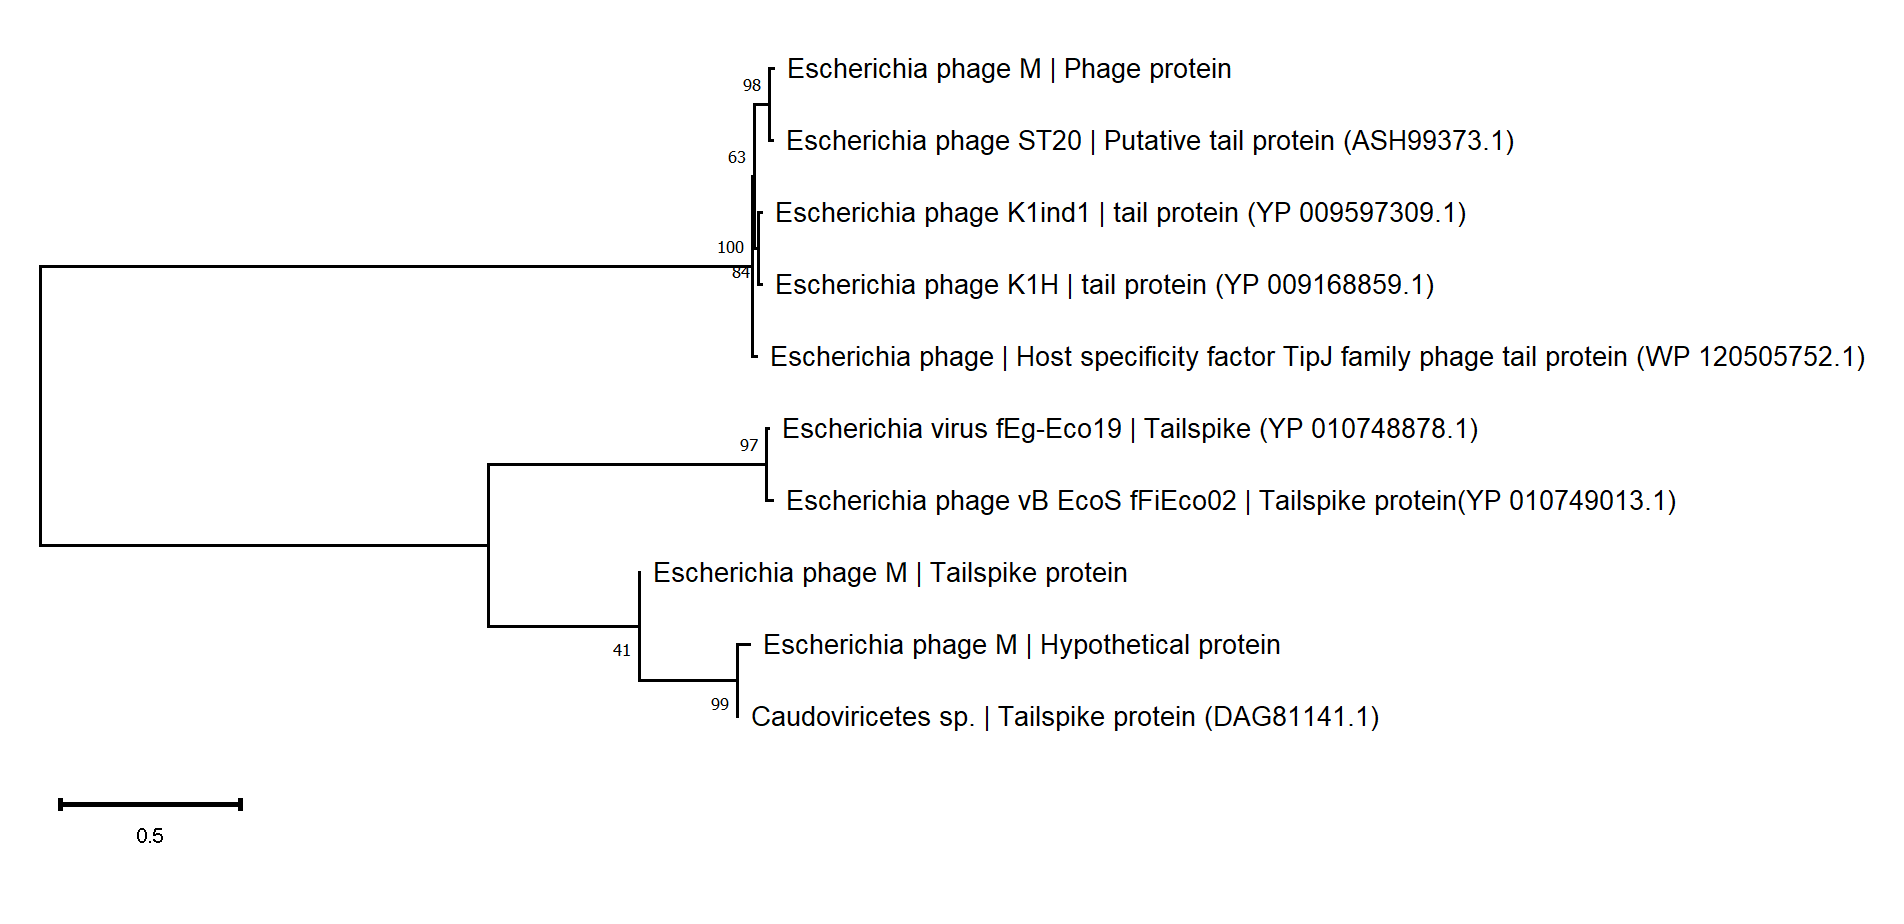


**Supplementary figure 4**: The receptor label distribution in the dataset with multiple entries.
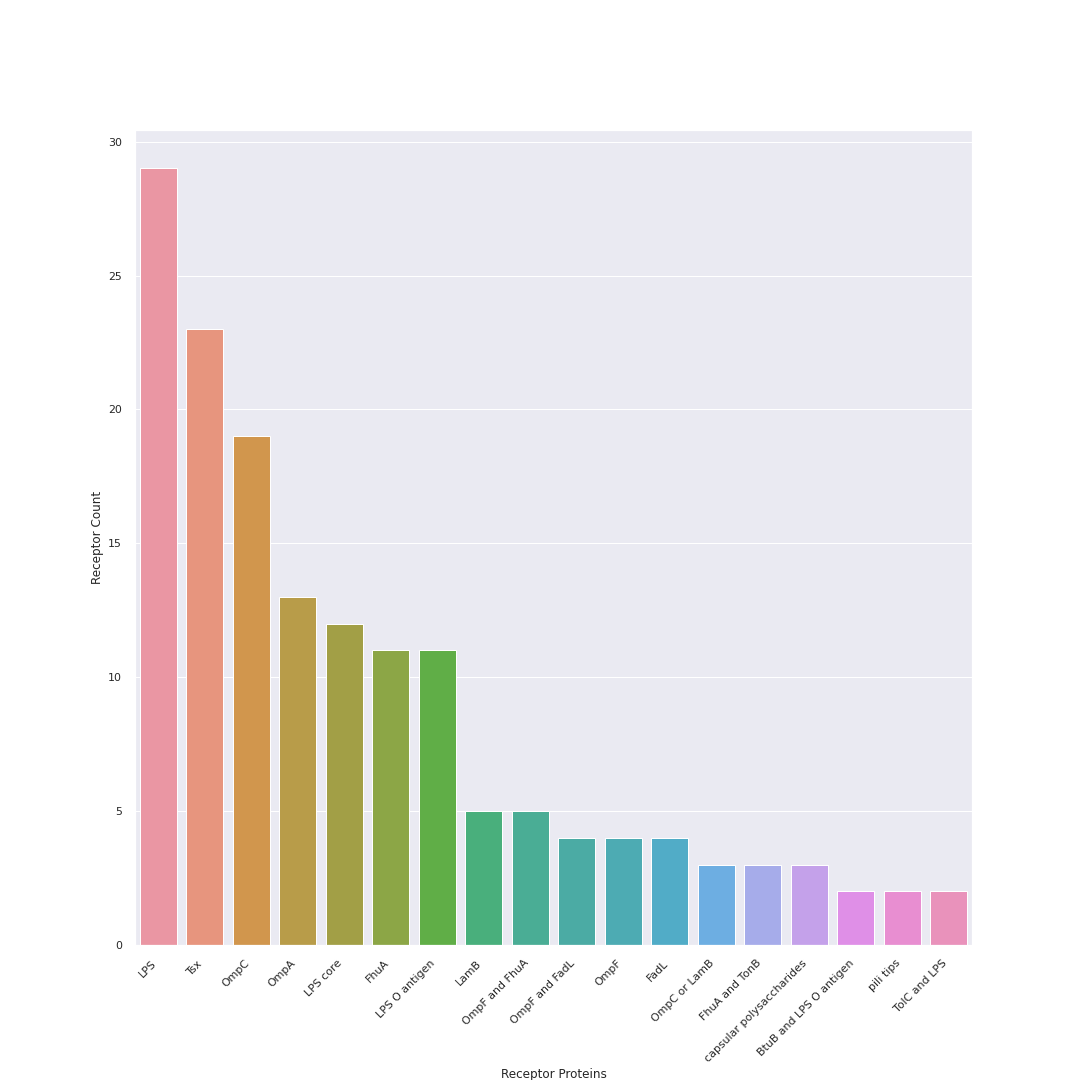


**Supplementary Figure 5:** One-step growth curve of U1G, CR and M phages


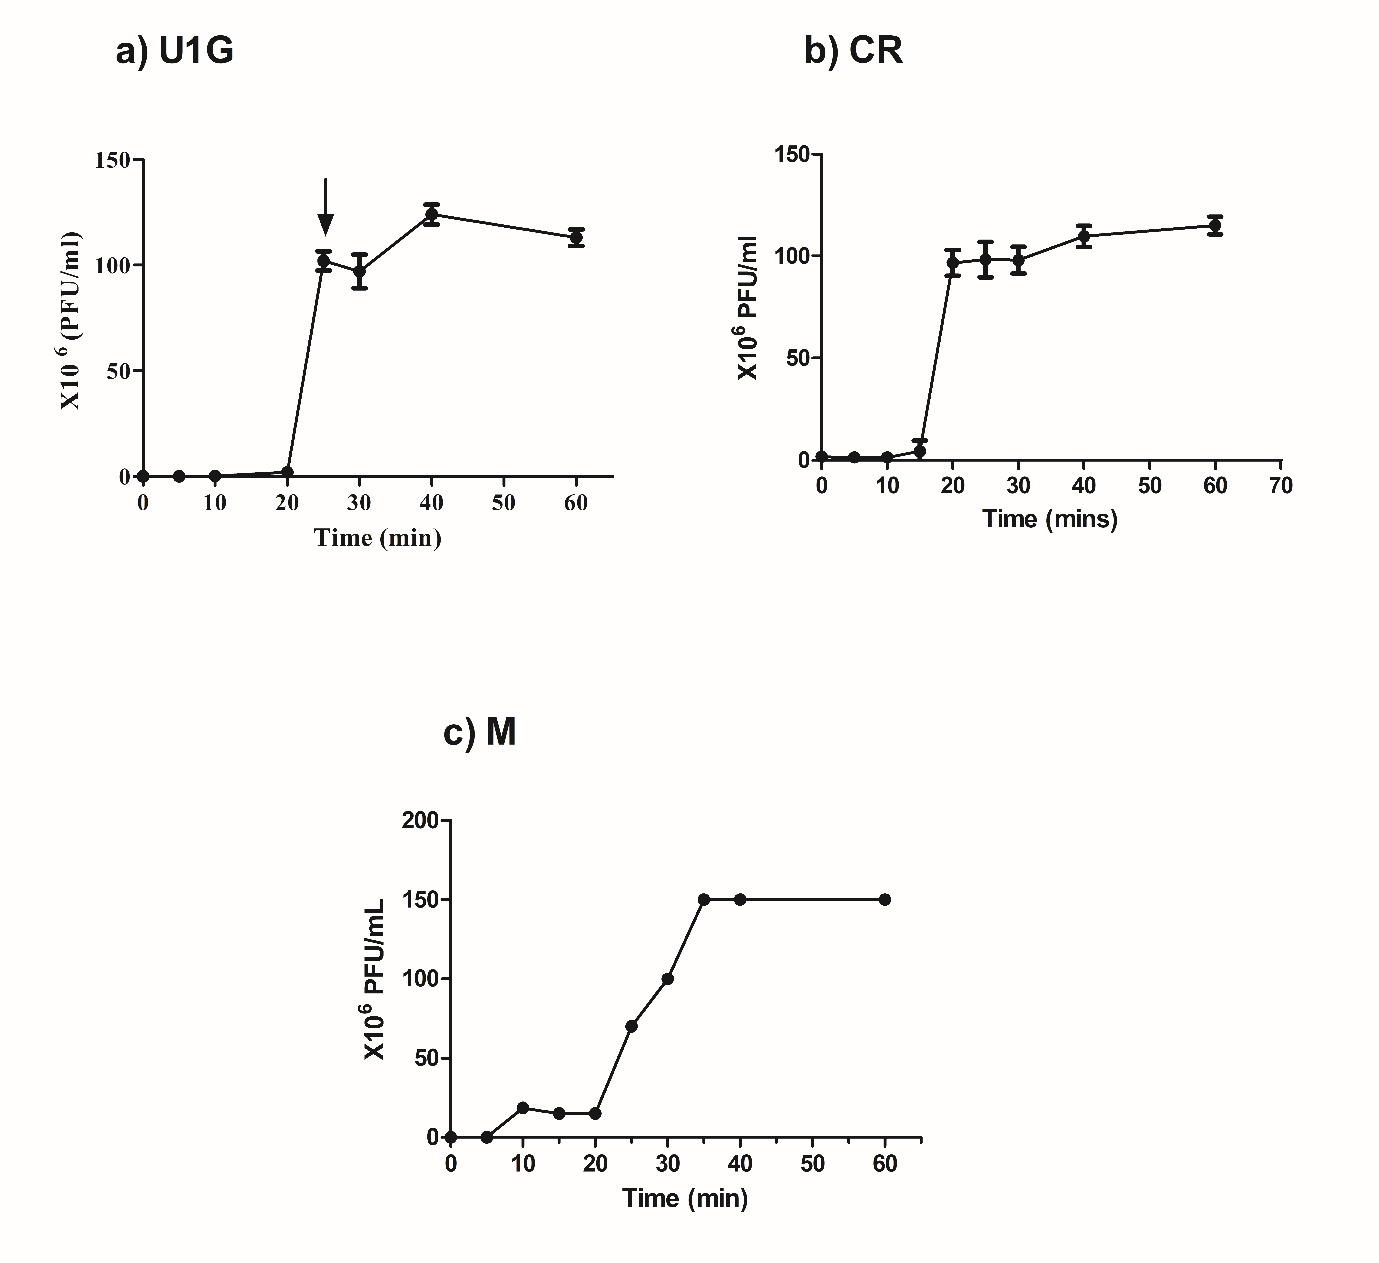


**Supplementary Figure 6a:** U1G is highly specific to U1007, with a slight lysis against U3790.


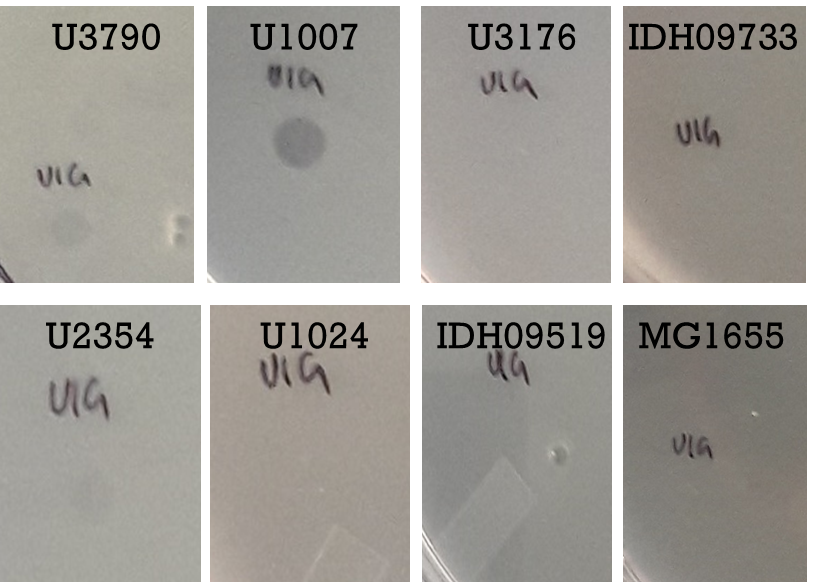

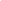

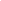


**Figure 6b:** M is highly specific to U1007, with a slight lysis against U2354.


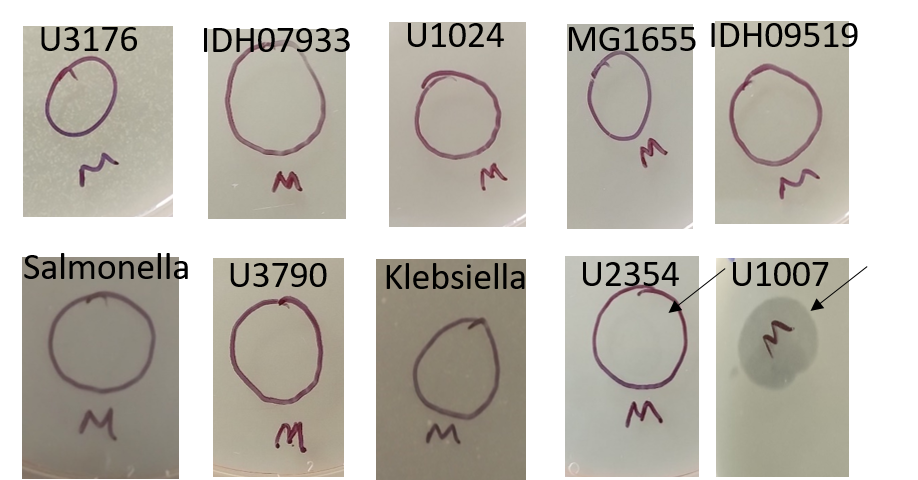


**Figure 6c.** CR is highly specific to U1007, with lysis against U2354.


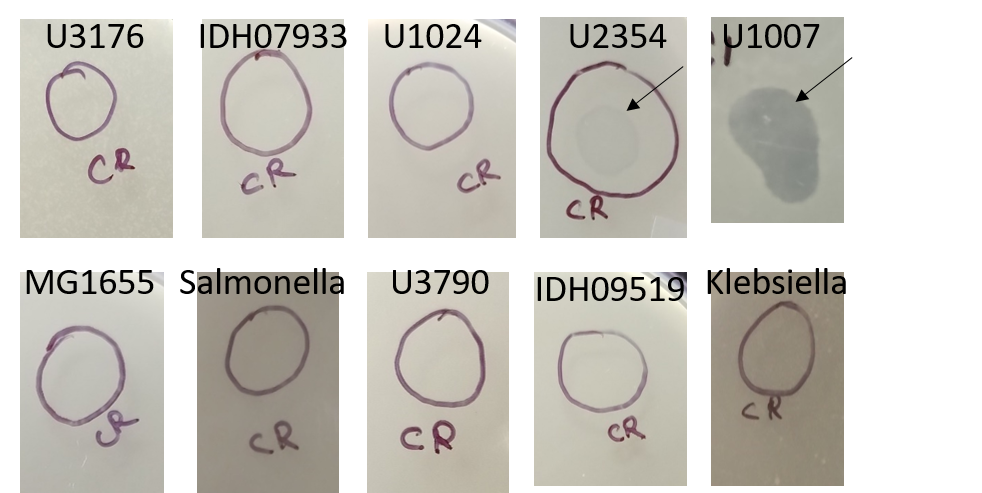


**Supplementary Figure 7: Representative Temperature stability data of U1G, CR and M phages**


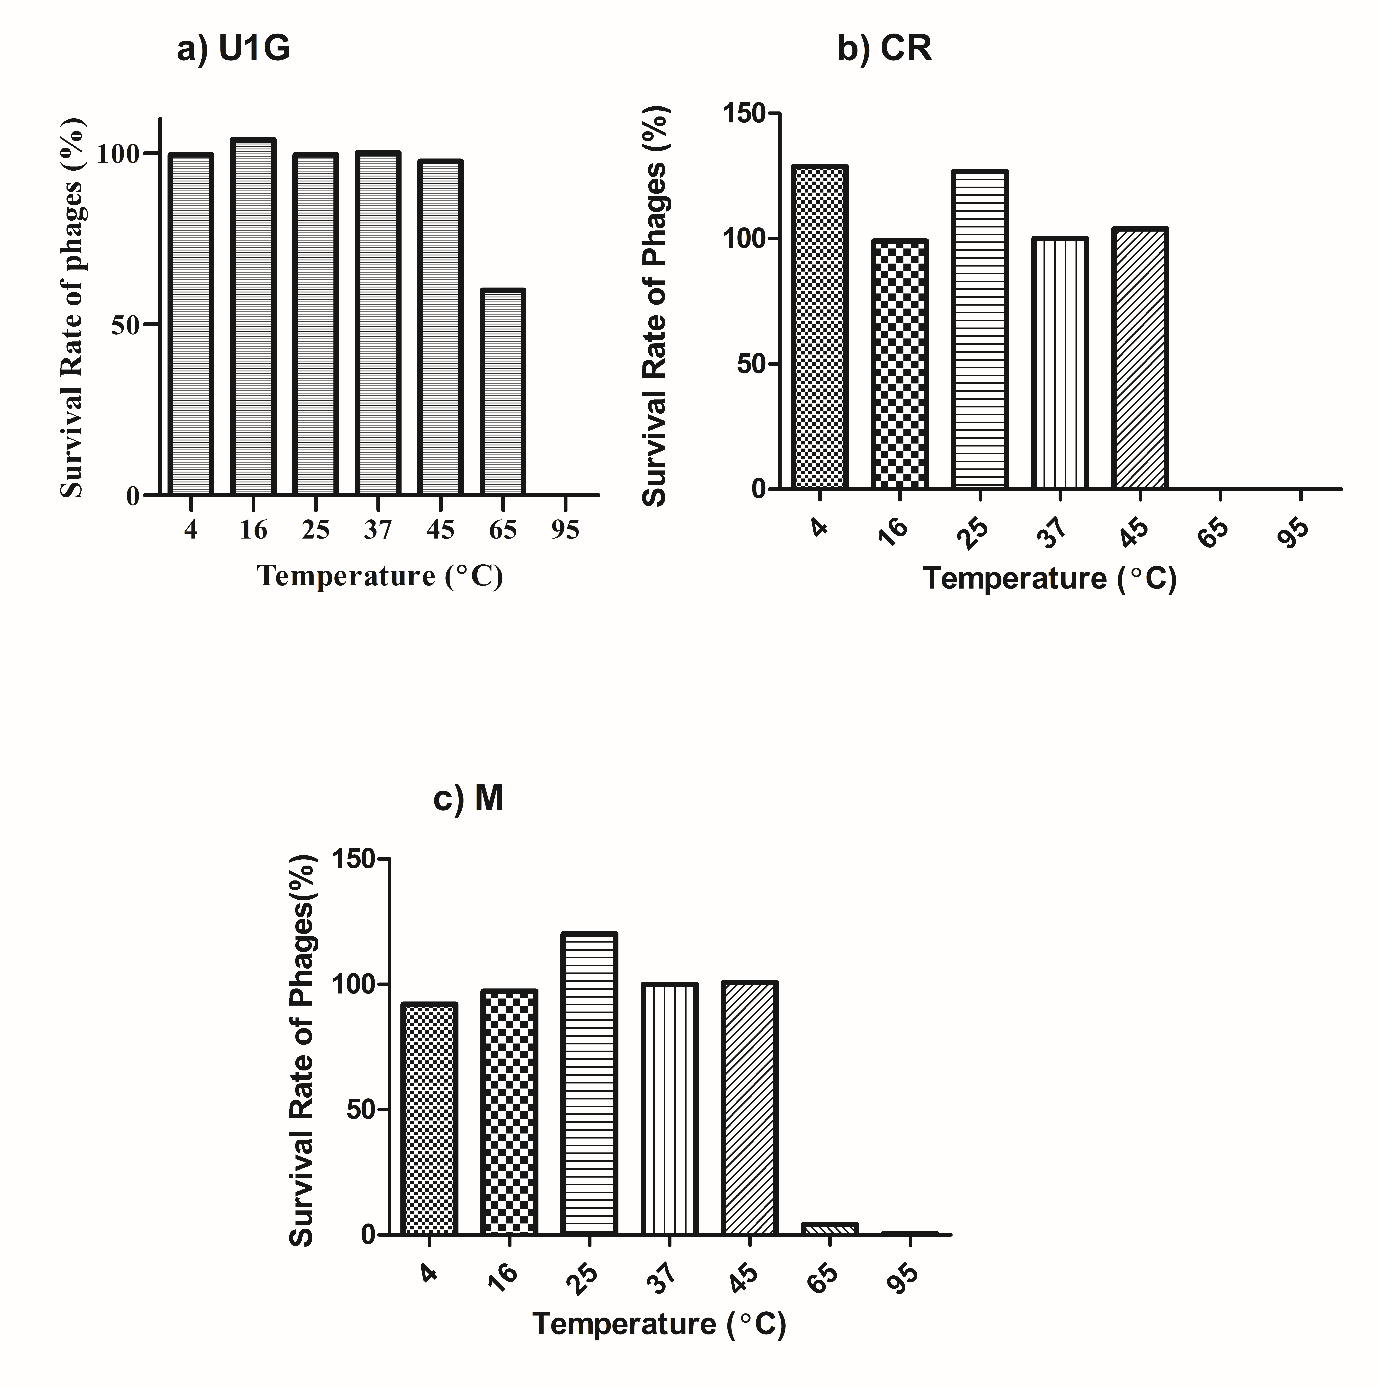


**Supplementary Figure 8: Representative pH stability data of U1G, CR and M phages**

**
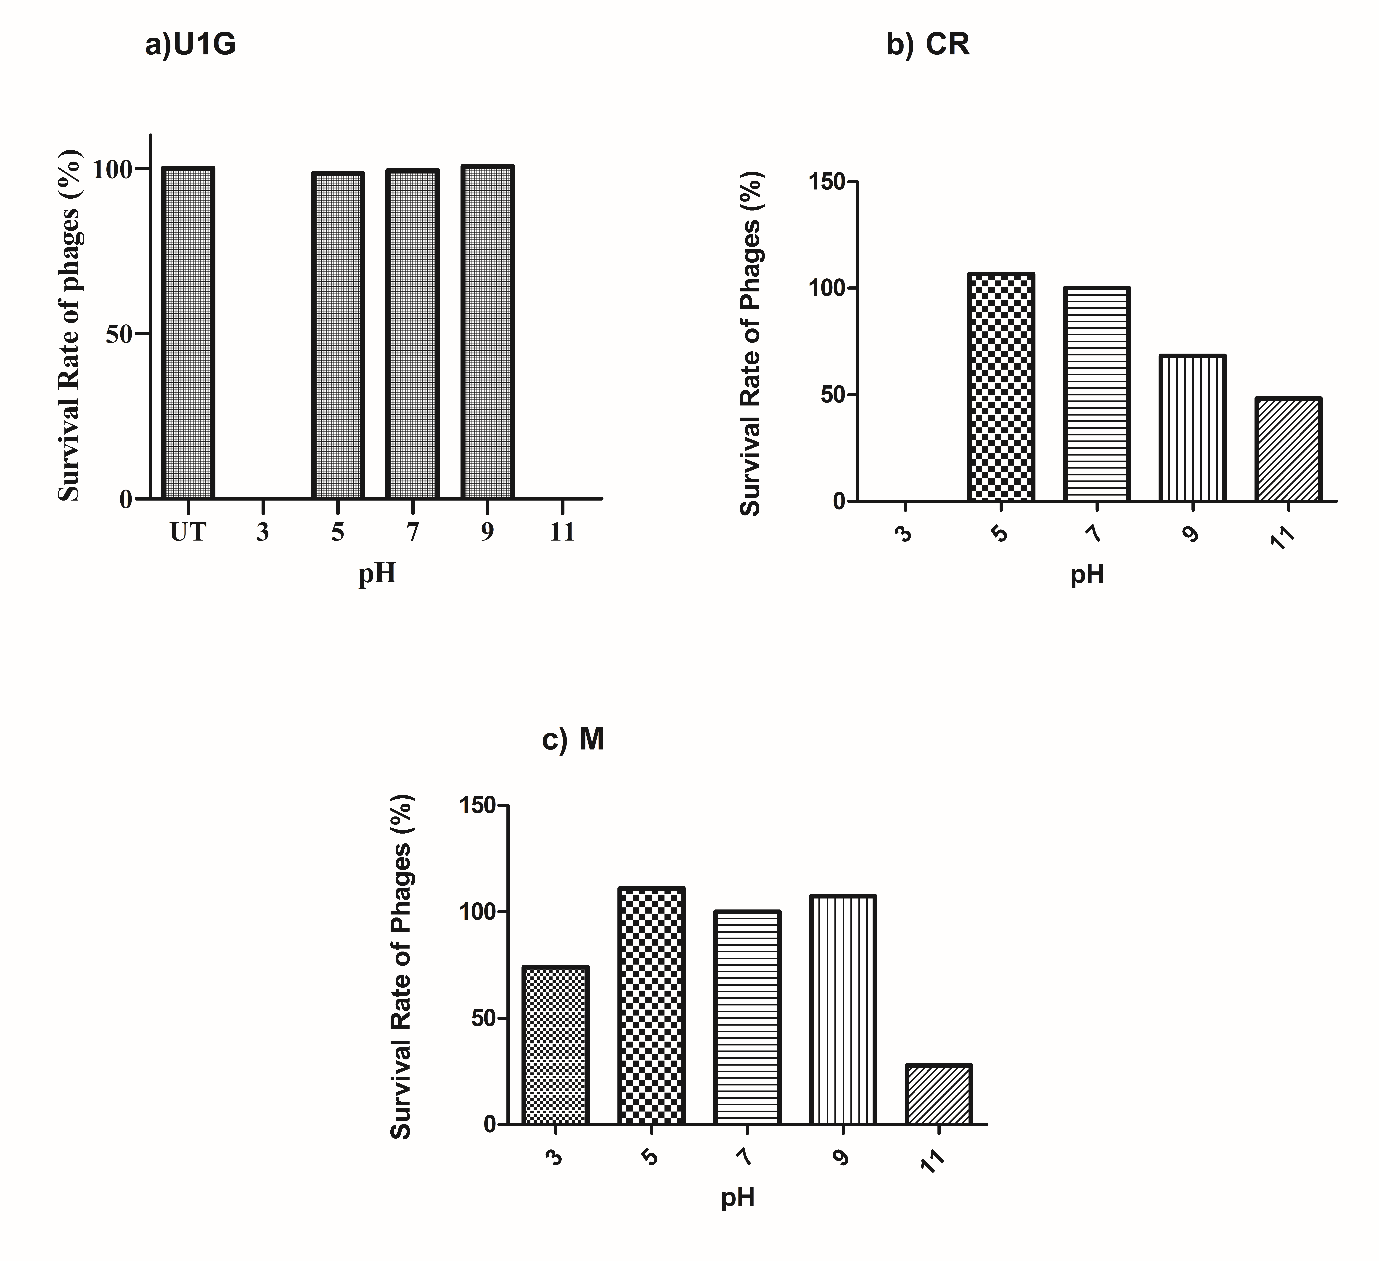
**

**Supplementary Figure 9: Representative toxicity testing of phages on zebrafish.** Phages were injected in muscle tissue and 48h post injection, liver and brain were dissected

**Supplementary Figure 10:**  ***In vivo* infection study with monophages**


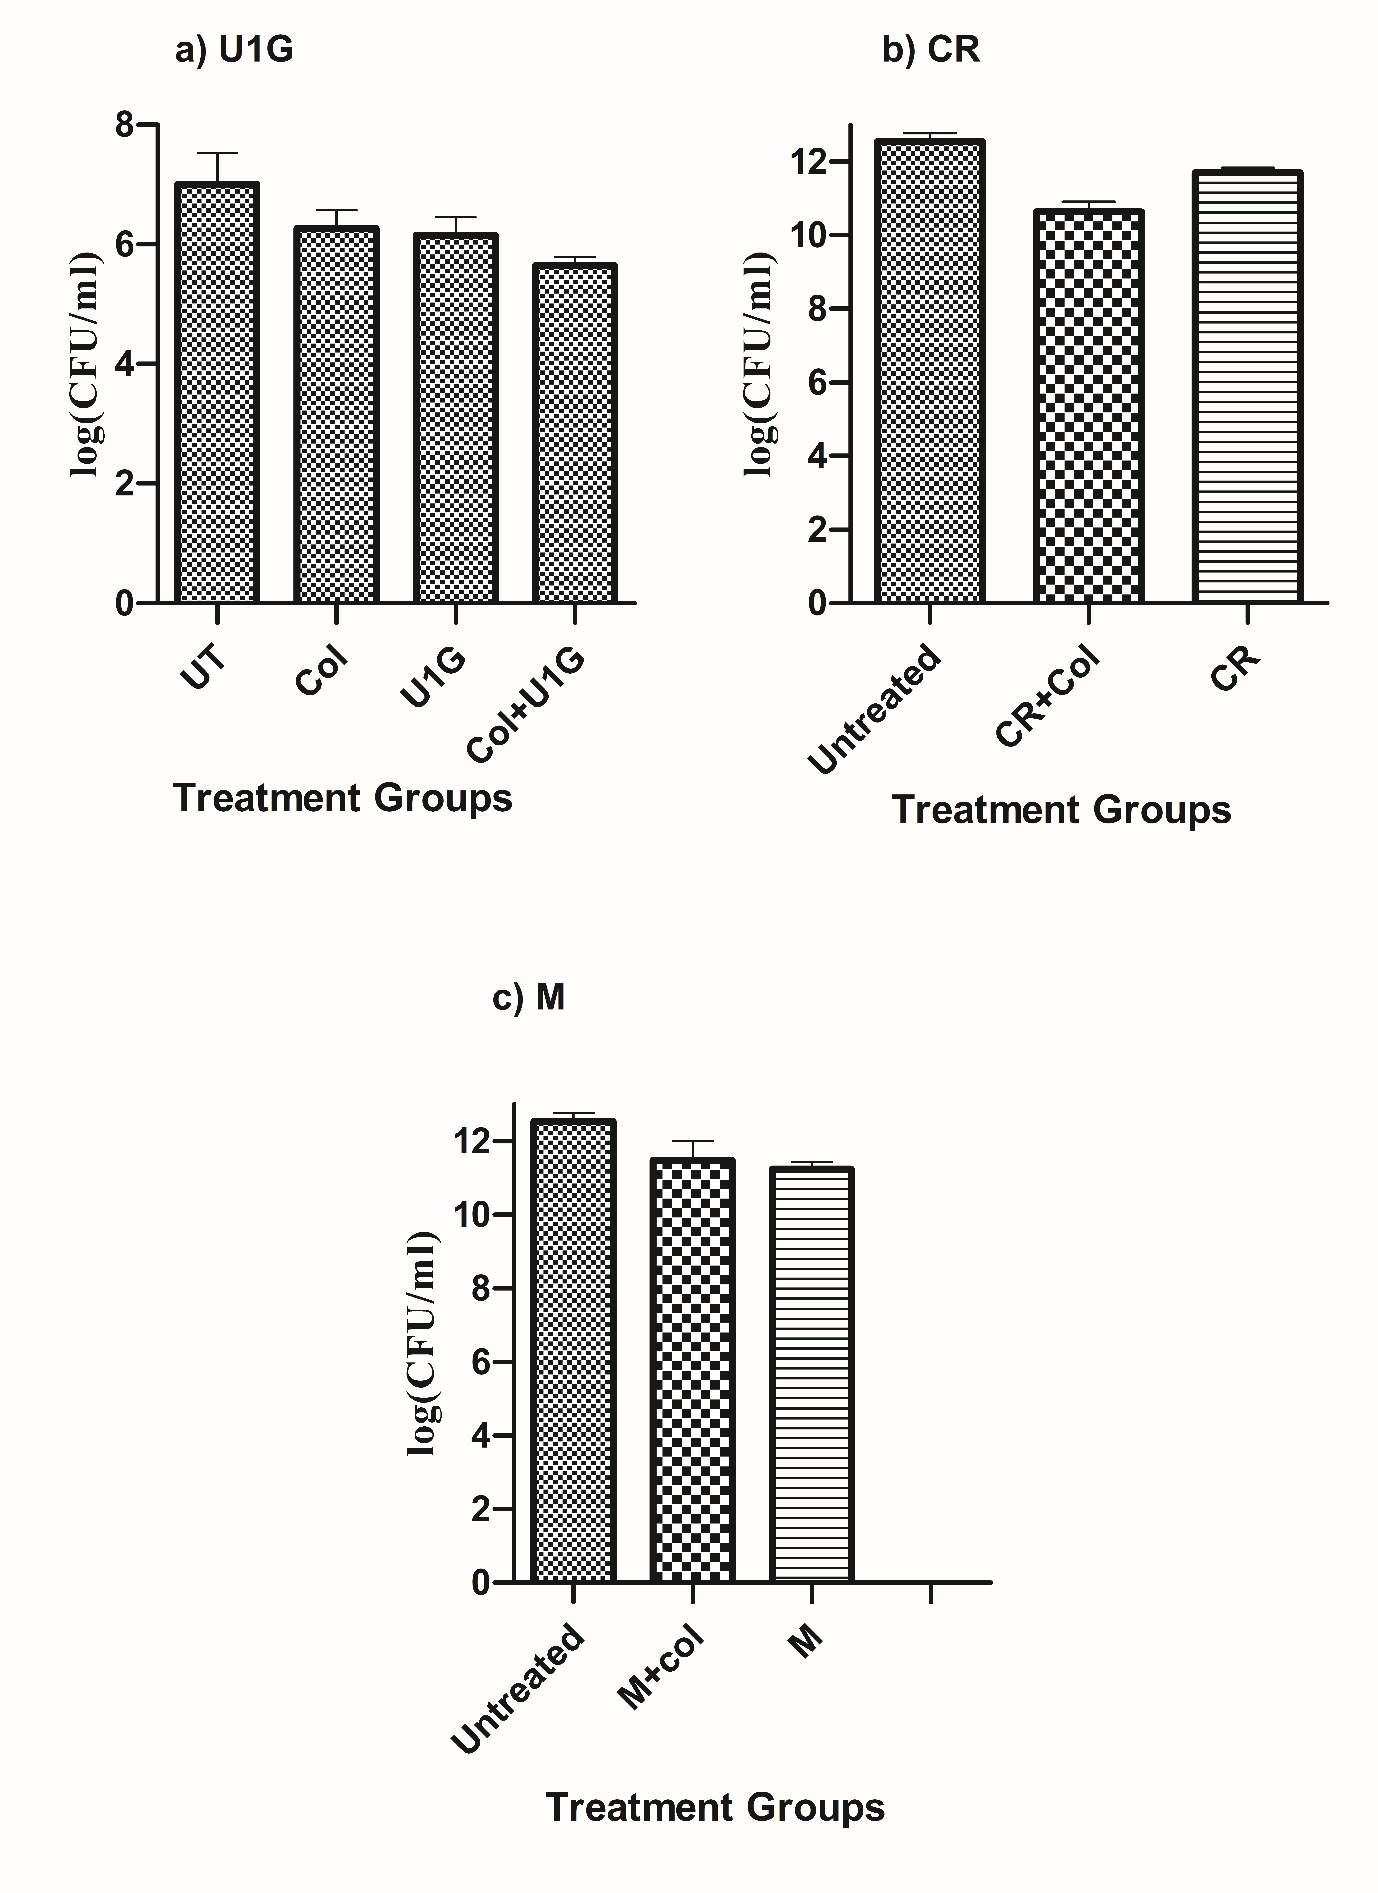


**Supplementary Figure 11: A) Strain U1007 is heteroresistant to colistin B) U1007 is ESBL positive**


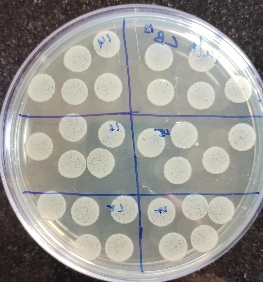


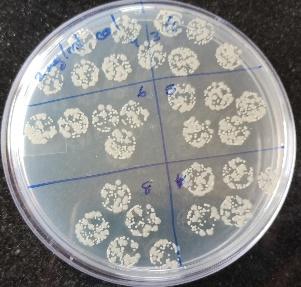

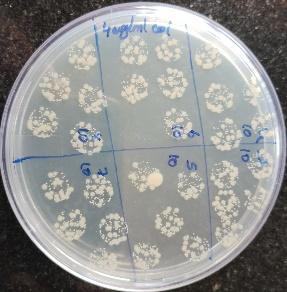

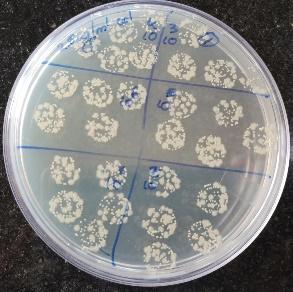


Colistin :0 µg/ml 2 µg/ml 2.5 µg/ml 4 µg/ml

**Heteroresistance Calculation**

No.of colonies on colistin plate * Dilution factor
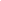


No. of colonies on antibiotic free plate * Dilution factor

= 30* 108/ 609*1010 =0.000492

**B) ESBL test was performed using Hexa G-minus 23 and Hexa G-plus 1 rings.**


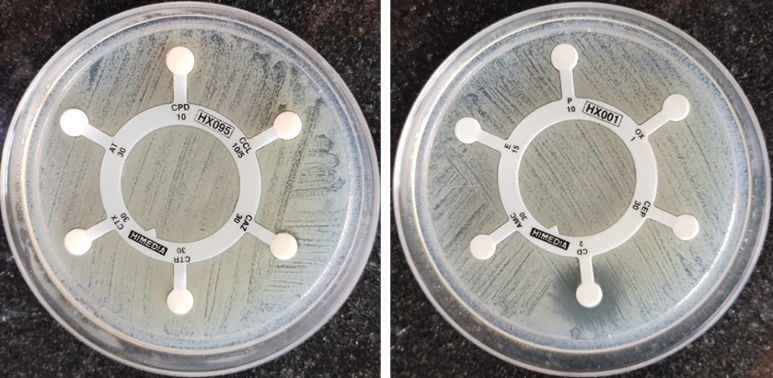


**Hexa G-minus 23**- Aztreonam(AT)-30mcg, Cefpodoxime(CPD)-10 mcg, Cefpodoxime/Clavulanic acid(CCL)-10/5 mcg, Ceftazidime(CAZ)- 30 mcg, Ceftriaxone(CTR)-30 mcg, Cefotaxime(CTX)-30 mcg,

**Hexa G-plus 1**- Penicillin G(P)-10units, Oxacillin(OX)-1mcg, Cephalothin(CEP)-30mcg, Clindamycin(CD)-2mcg, Erythromycin(E)-15mcg, Amoxyclav(AMC)- 30mcg

**Table S1**: Antimicrobial Resistant Genes in Genome of *E. coli* Clinical isolate U1007 using ResFinder.

| **Antimicrobial** | **Class** | **Genetic Background** |
| --- | --- | --- |
| amikacin | aminoglycoside | aac(6')-Ib-cr (aac(6')-Ib-cr_DQ303918), rmtB (rmtB_AB103506) |
| tobramycin | aminoglycoside | aac(6')-Ib-cr (aac(6')-Ib-cr_DQ303918), rmtB (rmtB_AB103506) |
| cefepime | beta-lactam | blaOXA-1 (blaOXA-1_HQ170510), blaNDM-5 (blaNDM-5_JN104597), blaCTX-M-15 (blaCTX-M-15_AY044436) |
| chloramphenicol | amphenicol | catB3 (catB3_U13880), catB3 (catB3_AJ009818) |
| piperacillin+tazobactam | beta-lactam | blaOXA-1 (blaOXA-1_HQ170510), blaNDM-5 (blaNDM-5_JN104597) |
| cefoxitin | beta-lactam | blaNDM-5 (blaNDM-5_JN104597) |
| ampicillin | beta-lactam | blaOXA-1 (blaOXA-1_HQ170510), blaTEM-1B (blaTEM-1B_AY458016), blaNDM-5 (blaNDM-5_JN104597), blaCTX-M-15 (blaCTX-M-15_AY044436) |
| ampicillin+clavulanic acid | beta-lactam | blaOXA-1 (blaOXA-1_HQ170510), blaNDM-5 (blaNDM-5_JN104597) |
| cefotaxime | beta-lactam | blaNDM-5 (blaNDM-5_JN104597), blaCTX-M-15 (blaCTX-M-15_AY044436) |
| ciprofloxacin | quinolone | aac(6')-Ib-cr (aac(6')-Ib-cr_DQ303918) gyrA (p.S83L) |
| sulfamethoxazole | folate pathway antagonist | sul1 (sul1_U12338), sul2 (sul2_AY034138) |
| imipenem | beta-lactam | blaNDM-5 (blaNDM-5_JN104597) |
| trimethoprim | folate pathway antagonist | dfrA17 (dfrA17_FJ460238) |
| nalidixic acid | quinolone | gyrA (p.S83L), gyrA (p.D87N) |
| ertapenem | beta-lactam | blaNDM-5 (blaNDM-5_JN104597) |
| tetracycline | tetracycline | tet(A) (tet(A)_AJ517790) |
| ceftazidime | beta-lactam | blaNDM-5 (blaNDM-5_JN104597), blaCTX-M-15 (blaCTX-M-15_AY044436) |
| temocillin | beta-lactam | blaNDM-5 (blaNDM-5_JN104597) |
| gentamicin | aminoglycoside | rmtB (rmtB_AB103506) |
| meropenem | beta-lactam | blaNDM-5 (blaNDM-5_JN104597) |
| azithromycin | macrolide | mph(A) (mph(A)_D16251) |
| isepamicin | aminoglycoside | rmtB (rmtB_AB103506) |
| hydrogen peroxide | peroxide | sitABCD (sitABCD_AY598030) |
| fluoroquinolone | quinolone | aac(6')-Ib-cr (aac(6')-Ib-cr_DQ303918) |
| cephalothin | beta-lactam | blaTEM-1B (blaTEM-1B_AY458016) |
| amoxicillin+clavulanic acid | beta-lactam | blaOXA-1 (blaOXA-1_HQ170510), blaNDM-5 (blaNDM-5_JN104597) |
| erythromycin | macrolide | mph(A) (mph(A)_D16251) |
| kanamycin | aminoglycoside | rmtB (rmtB_AB103506) |
| piperacillin | beta-lactam | blaOXA-1 (blaOXA-1_HQ170510), blaTEM-1B (blaTEM-1B_AY458016), blaNDM-5 (blaNDM-5_JN104597), blaCTX-M-15 (blaCTX-M-15_AY044436) |
| amoxicillin | beta-lactam | blaOXA-1 (blaOXA-1_HQ170510), blaTEM-1B (blaTEM-1B_AY458016), blaNDM-5 (blaNDM-5_JN104597), blaCTX-M-15 (blaCTX-M-15_AY044436) |
| ethidium bromide | quaternary ammonium compound | qacE (qacE_X68232) |
| sisomicin | aminoglycoside | aac(6')-Ib-cr (aac(6')-Ib-cr_DQ303918), rmtB (rmtB_AB103506) |
| spectinomycin | aminocyclitol | aadA5 (aadA5_AF137361) |
| doxycycline | tetracycline | tet(A) (tet(A)_AJ517790) |
| arbekacin | aminoglycoside | rmtB (rmtB_AB103506) |
| cefixime | beta-lactam | blaNDM-5 (blaNDM-5_JN104597) |
| benzylkonium chloride | quaternary ammonium compound | qacE (qacE_X68232) |
| ceftriaxone | beta-lactam | blaCTX-M-15 (blaCTX-M-15_AY044436) |
| telithromycin | macrolide | mph(A) (mph(A)_D16251) |
| ticarcillin | beta-lactam | blaTEM-1B (blaTEM-1B_AY458016), blaCTX-M-15 (blaCTX-M-15_AY044436) |
| chlorhexidine | quaternary ammonium compound | qacE (qacE_X68232) |
| cetylpyridinium chloride | quaternary ammonium compound | qacE (qacE_X68232) |
| spiramycin | macrolide | mph(A) (mph(A)_D16251) |
| dibekacin | aminoglycoside | aac(6')-Ib-cr (aac(6')-Ib-cr_DQ303918) |
| netilmicin | aminoglycoside | aac(6')-Ib-cr (aac(6')-Ib-cr_DQ303918) |
| aztreonam | beta-lactam | blaCTX-M-15 (blaCTX-M-15_AY044436) |
| streptomycin | aminoglycoside | aadA5 (aadA5_AF137361), aph(3'')-Ib (aph(3'')-Ib_AF321551), aph(6)-Id (aph(6)-Id_CP000971) |
| **colistin *** | **polymyxin** | **emrA_2, emrB_2** |

* genes identified using Roary.

**Table S2: Antimicrobial profile of *E. coli* clinical isolate U1007 determined by two fold microbroth dilution assay**

| **Class** | **Antibiotics** | **MIC(µg/mL)** |
| --- | --- | --- |
| Cephalosporin | Ceftriaxone | >128 |
| Carbapenem | Meropenem | >128 |
| Fluoroquinolones | Ciprofloxacin | >128 |
| Levofloxacin | 32 |
| Norfloxacin | >128 |
| Aminoglycosides | Gentamicin | >128 |
| Tobramycin | >128 |
| Streptomycin | 128 |
| Kanamycin | >128 |
| Antimycobacterial | Rifampicin | 32 |
| Macrolides | Erythromycin | >128 |
| Tetracycline | Minocycline | 8 |
| Polymyxin | Colistin | 4 |

**Table S3: Features of U1G, genome annotated by RAST**

| **Start** | **Stop** | **RAST** |
| --- | --- | --- |
| 170 | 493 | Phage protein |
| 584 | 943 | hypothetical protein |
| 997 | 1203 | hypothetical protein |
| 1330 | 1713 | Phage integrase |
| 1857 | 2156 | hypothetical protein |
| 2159 | 2377 | hypothetical protein |
| 2374 | 2547 | hypothetical protein |
| 2571 | 3044 | Phage HNH homing endonuclease (ACLAME 27) |
| 3049 | 3180 | hypothetical protein |
| 3314 | 3622 | hypothetical protein |
| 3619 | 3840 | hypothetical protein |
| 3837 | 4094 | hypothetical protein |
| 4091 | 4411 | Phage antirepressor protein |
| 4414 | 4596 | hypothetical protein |
| 4593 | 4973 | hypothetical protein |
| 5027 | 5845 | hypothetical protein |
| 5835 | 5996 | hypothetical protein |
| 6043 | 7260 | hypothetical protein |
| 7318 | 7500 | hypothetical protein |
| 7575 | 8408 | Phage fibritin (wac) protein |
| 8474 | 8788 | Superinfection exclusion protein (Protein gp17) |
| 8893 | 9081 | hypothetical protein |
| 9078 | 9338 | hypothetical protein |
| 9335 | 9520 | hypothetical protein |
| 9521 | 9847 | hypothetical protein |
| 9882 | 10202 | Phage protein |
| 10313 | 10882 | HNH homing endonuclease # Phage intron |
| 11142 | 11816 | Phage protein |
| 11824 | 12327 | hypothetical protein |
| 12324 | 12998 | hypothetical protein |
| 12998 | 13504 | Phage protein |
| 13514 | 13723 | hypothetical protein |
| 13797 | 14039 | hypothetical protein |
| 14055 | 14387 | hypothetical protein |
| 14554 | 14997 | hypothetical protein |
| 14997 | 15941 | Phage protein |
| 16009 | 16221 | hypothetical protein |
| 16214 | 16543 | Phage protein |
| 16536 | 16730 | hypothetical protein |
| 16774 | 19341 | Phage rIIA lysis inhibitor |
| 19346 | 21406 | hypothetical protein |
| 21469 | 21864 | hypothetical protein |
| 21911 | 22045 | hypothetical protein |
| 22108 | 22233 | Phage protein |
| 22725 | 24077 | Phage DNA helicase |
| 24088 | 24618 | hypothetical protein |
| 24628 | 26442 | DNA polymerase I (EC 2.7.7.7), phage-associated |
| 26439 | 27095 | Phage protein (ACLAME 141) |
| 27076 | 28047 | DNA polymerase I (EC 2.7.7.7), phage-associated |
| 28044 | 28349 | hypothetical protein |
| 28349 | 28822 | hypothetical protein |
| 28822 | 29799 | hypothetical protein |
| 29796 | 30233 | Phage-associated homing endonuclease |
| 30276 | 32426 | Phage-associated DNA primase |
| 32483 | 32884 | Phage protein |
| 32950 | 33234 | Phage protein |
| 33430 | 34071 | hypothetical protein |
| 34071 | 34625 | hypothetical protein |
| 34627 | 35067 | hypothetical protein |
| 35299 | 35412 | hypothetical protein |
| 36836 | 37216 | hypothetical protein |
| 48080 | 37326 | DNA polymerase, phage-associated |
| 49890 | 48175 | hypothetical protein |
| 50138 | 49884 | hypothetical protein |
| 50594 | 50151 | hypothetical protein |
| 53262 | 50608 | hypothetical protein |
| 54100 | 53264 | hypothetical protein |
| 54809 | 54177 | hypothetical protein |
| 56085 | 54883 | hypothetical protein |
| 57322 | 56102 | Phage tape measure protein |
| 57686 | 57342 | Phage protein |
| 59970 | 57700 | Phage portal (connector) protein |
| 60479 | 59973 | hypothetical protein |
| 60891 | 60460 | Phage protein |
| 61094 | 60996 | hypothetical protein |
| 61657 | 61328 | Phage tail length tape-measure protein T |
| 62449 | 61916 | hypothetical protein |
| 63285 | 62485 | hypothetical protein |
| 63800 | 63477 | Phage tailspike protein |
| 65447 | 64050 | hypothetical protein |
| 67642 | 65492 | hypothetical protein |
| 68349 | 67639 | hypothetical protein |
| 69945 | 68356 | Phage terminase, large subunit |
| 70627 | 69938 | hypothetical protein |
| 70811 | 71089 | hypothetical protein |
| 71654 | 71968 | hypothetical protein |
| 71972 | 72292 | hypothetical protein |
| 72292 | 72576 | hypothetical protein |
| 72573 | 72887 | hypothetical protein |
| 72877 | 73215 | hypothetical protein |

**Table S4: Features of CR phage genome annotated by RAST**

| **start** | **stop** | **strand** | **function** |
| --- | --- | --- | --- |
| 229 | 351 | + | hypothetical protein |
| 433 | 819 | + | Phage protein |
| 1010 | 1711 | + | Phage protein |
| 1714 | 1824 | + | Phage major capsid protein of Caudovirales |
| 1977 | 2762 | + | Phage major capsid protein of Caudovirales |
| 2824 | 3165 | + | Phage fibritin (wac) protein |
| 3202 | 3381 | + | hypothetical protein |
| 3385 | 3537 | + | hypothetical protein |
| 3531 | 3758 | + | Phage protein (ACLAME 313) |
| 3761 | 4039 | + | Phage protein |
| 4042 | 4656 | + | Phage protein |
| 4656 | 4787 | + | hypothetical protein |
| 4784 | 5143 | + | Phage protein |
| 5140 | 5640 | + | Phage protein |
| 5640 | 6053 | + | Phage protein |
| 6056 | 7222 | + | Phage protein |
| 7804 | 7250 | - | hypothetical protein |
| 8289 | 7804 | - | 3'-phosphatase, 5'-polynucleotide kinase, phage-associated |
| 8975 | 8286 | - | hypothetical protein |
| 9466 | 8972 | - | Phage protein |
| 9807 | 9481 | - | hypothetical protein |
| 9972 | 10388 | + | Phage protein |
| 10487 | 10750 | + | hypothetical protein |
| 10743 | 12587 | + | Phage tail tape measure |
| 12692 | 13054 | + | Phage tail tape measure |
| 13054 | 14001 | + | Phage protein |
| 14133 | 14444 | + | hypothetical protein |
| 14448 | 14963 | + | Phage protein |
| 14960 | 15325 | + | Phage protein |
| 15388 | 17874 | + | Phage protein |
| 17887 | 19332 | + | Phage tailspike |
| 19345 | 19461 | + | hypothetical protein |
| 19533 | 19721 | + | hypothetical protein |
| 19887 | 19750 | - | Phage protein |
| 20399 | 19884 | - | hypothetical protein |
| 21820 | 20396 | - | Phage DNA helicase |
| 22501 | 22310 | - | Phage protein |
| 22831 | 22532 | - | Phage protein |
| 23006 | 22812 | - | hypothetical protein |
| 23220 | 23089 | - | hypothetical protein |
| 23614 | 23210 | - | DNA polymerase I (EC 2.7.7.7), phage-associated |
| 23976 | 23659 | - | DNA polymerase I (EC 2.7.7.7), phage-associated |
| 25409 | 24006 | - | DNA polymerase I (EC 2.7.7.7), phage-associated |
| 26095 | 25469 | - | Phage protein |
| 26430 | 26179 | - | hypothetical protein |
| 27533 | 26427 | - | Phage protein |
| 27667 | 27527 | - | Phage protein |
| 28011 | 27664 | - | Phage protein |
| 28280 | 28008 | - | hypothetical protein |
| 28591 | 28277 | - | hypothetical protein |
| 29153 | 28635 | - | 13.88 kDa late protein |
| 29403 | 29176 | - | hypothetical protein |
| 29526 | 29741 | + | hypothetical protein |
| 30390 | 29758 | - | Phage replicative DNA helicase, repA |
| 30635 | 30381 | - | hypothetical protein |
| 32014 | 30644 | - | Phage replicative DNA helicase, repA |
| 32235 | 32074 | - | Phage protein |
| 32473 | 32303 | - | Phage protein |
| 32940 | 32590 | - | hypothetical protein |
| 32971 | 33189 | + | hypothetical protein |
| 33208 | 33393 | + | hypothetical protein |
| 33393 | 33632 | + | hypothetical protein |
| 33899 | 34090 | + | hypothetical protein |
| 34094 | 34285 | + | hypothetical protein |
| 34289 | 34432 | + | hypothetical protein |
| 34436 | 34636 | + | hypothetical protein |
| 34772 | 35002 | + | hypothetical protein |
| 35072 | 35449 | + | hypothetical protein |
| 35446 | 35649 | + | Phage protein |
| 35652 | 35855 | + | hypothetical protein |
| 35855 | 36148 | + | hypothetical protein |
| 36145 | 36585 | + | Phage protein |
| 36645 | 36953 | + | hypothetical protein |
| 36946 | 37218 | + | gp55 |
| 37196 | 37681 | + | Phage lysin (EC 3.2.1.17) |
| 38028 | 38177 | + | Phage protein |
| 38174 | 38371 | + | hypothetical protein |
| 38368 | 38523 | + | Phage protein |
| 38520 | 38717 | + | hypothetical protein |
| 38698 | 38886 | + | hypothetical protein |
| 38974 | 39141 | + | hypothetical protein |
| 39313 | 39161 | - | hypothetical protein |
| 39332 | 39568 | + | Phage protein |
| 39565 | 39714 | + | hypothetical protein |
| 39841 | 40386 | + | Phage protein |
| 40383 | 40832 | + | Putative phage terminase |
| 40919 | 41413 | + | Phage terminase, large subunit |
| 41416 | 41631 | + | Phage terminase, large subunit |
| 41644 | 42798 | + | 62kDa structural protein |
| 42774 | 43112 | + | 62kDa structural protein |
| 43427 | 43146 | - | hypothetical protein |
| 43536 | 44288 | + | Putative head protein (ACLAME 50) |
| 44435 | 44578 | + | Putative head protein (ACLAME 50) |
| 44581 | 45039 | + | Phage fibritin (wac) protein |
| 45235 | 45068 | - | hypothetical protein |

**Table S5: Features of M phage genome annotated by RAST**

| **start** | **stop** | **strand** | **function** |
| --- | --- | --- | --- |
| 1 | 180 | + | hypothetical protein |
| 352 | 200 | - | hypothetical protein |
| 371 | 607 | + | Phage protein |
| 604 | 753 | + | hypothetical protein |
| 930 | 1046 | + | hypothetical protein |
| 1080 | 1427 | + | Phage protein |
| 1424 | 2017 | + | Phage terminase |
| 2383 | 2676 | + | Phage terminase, large subunit |
| 2689 | 3357 | + | 62kDa structural protein |
| 3350 | 4159 | + | 62kDa structural protein |
| 4475 | 4194 | - | hypothetical protein |
| 4584 | 5474 | + | Phage protein |
| 5488 | 5631 | + | Putative head protein (ACLAME 50) |
| 5714 | 6091 | + | Phage fibritin (wac) protein |
| 6088 | 6192 | + | hypothetical protein |
| 6398 | 6514 | + | hypothetical protein |
| 6792 | 6574 | - | hypothetical protein |
| 7191 | 7892 | + | Phage protein |
| 7895 | 8347 | + | Phage major capsid protein of Caudovirales |
| 8344 | 8946 | + | Phage major capsid protein of Caudovirales |
| 9009 | 9128 | + | hypothetical protein |
| 9148 | 9351 | + | Phage fibritin (wac) protein |
| 9389 | 9568 | + | hypothetical protein |
| 9572 | 9724 | + | hypothetical protein |
| 9718 | 10227 | + | Phage protein |
| 10230 | 10844 | + | Phage protein |
| 10844 | 10975 | + | hypothetical protein |
| 10972 | 11331 | + | Phage protein |
| 11328 | 11828 | + | Phage protein |
| 11828 | 12241 | + | Phage protein |
| 12244 | 13410 | + | Phage protein |
| 13993 | 13439 | - | hypothetical protein |
| 14478 | 13993 | - | 3'-phosphatase, 5'-polynucleotide kinase, phage-associated |
| 14753 | 14475 | - | Phage transcriptional regulator |
| 15608 | 14754 | - | Phage protein |
| 16000 | 15674 | - | hypothetical protein |
| 16165 | 16581 | + | Phage protein |
| 16680 | 16943 | + | hypothetical protein |
| 16936 | 19248 | + | Phage tail tape measure |
| 19285 | 19941 | + | Phage protein |
| 20330 | 20641 | + | hypothetical protein |
| 20645 | 21160 | + | Phage protein |
| 21157 | 21522 | + | Phage protein |
| 21513 | 24071 | + | Phage protein |
| 24084 | 24416 | + | Phage tailspike |
| 24422 | 25735 | + | hypothetical protein |
| 25732 | 25920 | + | hypothetical protein |
| 26086 | 25949 | - | Phage protein |
| 26238 | 26083 | - | hypothetical protein |
| 26600 | 26319 | - | hypothetical protein |
| 26779 | 26597 | - | Phage DNA helicase |
| 27005 | 26889 | - | Phage DNA helicase |
| 28023 | 26965 | - | Phage DNA helicase |
| 28516 | 28397 | - | Phage-associated homing endonuclease |
| 28704 | 28513 | - | Phage protein |
| 29034 | 28735 | - | Phage protein |
| 29209 | 29015 | - | hypothetical protein |
| 29424 | 29293 | - | hypothetical protein |
| 29603 | 29418 | - | DNA polymerase I (EC 2.7.7.7), phage-associated |
| 29830 | 29600 | - | DNA polymerase I (EC 2.7.7.7), phage-associated |
| 30194 | 29868 | - | DNA polymerase I (EC 2.7.7.7), phage-associated |
| 30352 | 30224 | - | DNA polymerase I (EC 2.7.7.7), phage-associated |
| 31274 | 30378 | - | DNA polymerase I (EC 2.7.7.7), phage-associated |
| 31628 | 31455 | - | DNA polymerase I (EC 2.7.7.7), phage-associated |
| 32315 | 31689 | - | Phage protein |
| 32654 | 32436 | - | hypothetical protein |
| 32989 | 32651 | - | Phage protein |
| 33404 | 33051 | - | Phage protein |
| 33663 | 33472 | - | Phage protein |
| 33830 | 33684 | - | Phage protein |
| 34029 | 33895 | - | Phage protein |
| 34243 | 34040 | - | Phage protein |
| 34512 | 34240 | - | hypothetical protein |
| 34823 | 34509 | - | hypothetical protein |
| 35087 | 34866 | - | 13.88 kDa late protein |
| 35356 | 35114 | - | hypothetical protein |
| 35540 | 35391 | - | hypothetical protein |
| 35647 | 35862 | + | hypothetical protein |
| 36512 | 35880 | - | Phage replicative DNA helicase, repA |
| 38122 | 36503 | - | Phage replicative DNA helicase, repA |
| 38342 | 38181 | - | Phage protein |
| 38580 | 38410 | - | Phage protein |
| 39038 | 38751 | - | hypothetical protein |
| 39094 | 39312 | + | hypothetical protein |
| 39331 | 39516 | + | hypothetical protein |
| 39857 | 39985 | + | hypothetical protein |
| 40048 | 40239 | + | hypothetical protein |
| 40243 | 40434 | + | hypothetical protein |
| 40438 | 40581 | + | hypothetical protein |
| 40585 | 40785 | + | hypothetical protein |
| 40921 | 41151 | + | hypothetical protein |
| 41218 | 41754 | + | hypothetical protein |
| 41751 | 41954 | + | Phage protein |
| 41955 | 42350 | + | hypothetical protein |
| 42595 | 42909 | + | hypothetical protein |
| 42969 | 43274 | + | hypothetical protein |
| 43271 | 43543 | + | hypothetical protein |
| 43580 | 43966 | + | Phage lysin (EC 3.2.1.17) |
| 44006 | 44122 | + | hypothetical protein |
| 44446 | 44595 | + | Phage protein |
| 44592 | 44789 | + | hypothetical protein |
| 44786 | 44941 | + | Phage protein |
| 44938 | 45135 | + | hypothetical protein |
| 45116 | 45292 | + | hypothetical protein |

**Table S6:  The dataset with RBP and host receptor information used for building the ML models.**

<https://docs.google.com/spreadsheets/d/13BCVyxdjq-PVnH3MuY0T2RAiINW6wk5L/edit#gid=230086930>
